# Supplementary material
Source: Springer Nature journal article supplement (https://www.springermedizin.de/resource/supplementary/13058_2009_2536_MOESM10_ESM.pdf/9701642)

**A**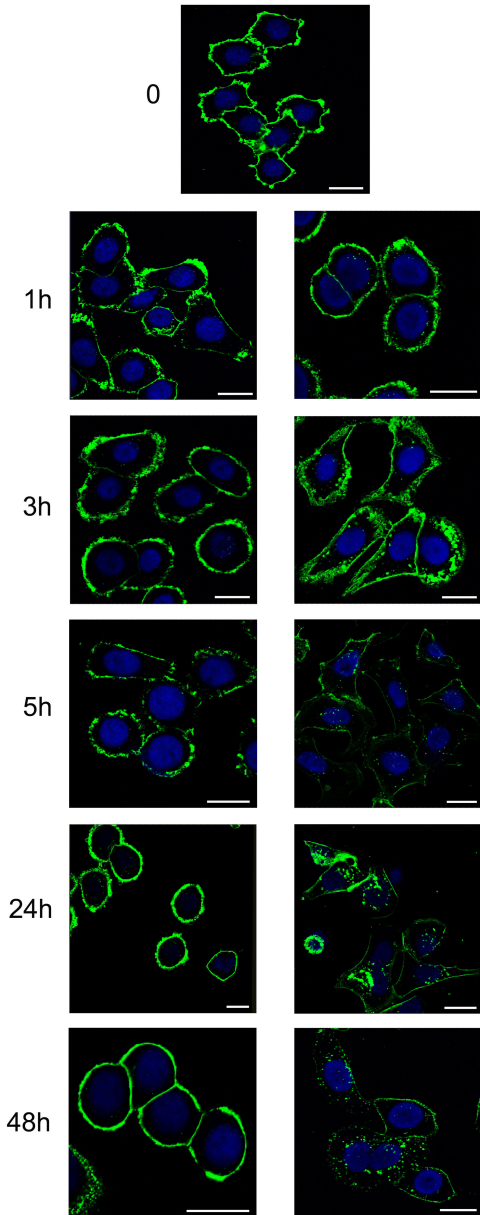**B**

0      24h      48h      72h

CTR   D609   HERC   COMB   D609   HERC   COMB   D609   HERC   COMB   CTR

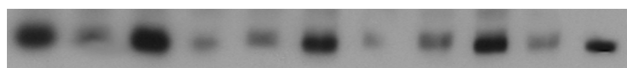

Supplement: MOESM10 [file 9701642]
